# Supplementary material for: Nrf1 deficiency promotes tubular ferroptosis by regulating ACSL4 in cisplatin-induced acute kidney injury
Source: Research Square preprint supplement (doi:10.21203/rs.3.rs-5521417/v1), 2025-02-04
Supplement: Supplementary file 1 [file 9502823dd6e44a0f52505bb9.xlsx]

## Sheet: Sheet1
	Table1 primer sequences used for RT-qPCR.
		sense sequence	antisense sequence
	ACSL4	5′- TGTGGACAATAAGGCTATCA-3′	5′-TGGTCTACTTGGAGGAATG-3′
	GPX4	5′- GAGGCAAGACCGAAGTAAACTAC-3′	5′-CCGAACTGGTTACACGGGAA-3′
	TFR	5′-ACCATTGTCATATACCCGGTTCA-3′	5′- CAATAGCCCAAGTAGCCAATCAT-3′
	FTL	5′-CAGCCTGGTCAATTTGTACCT-3′	5′-GCCAATTCGCGGAAGAAGTG-3′
	gADPH	5′-GGAGCGAGATCCCTCCAAAAT-3′	5′-GGCTGTTGTCATACTTCTCATGG3′
